# Supplementary material for: Prognostic Value of 18F–FDG–PET Parameters in Patients with Small Cell Lung Cancer: A Meta-Analysis and Review of Current Literature
Source: MDPI journal article supplement (doi:10.3390/diagnostics11020174), 2021-01-26
Supplement: s1 [file s1]

**Table S1:** Studies included in meta-analysis. Definition of PET-parameters and cutoff.

| Study            | Patients<br>N (LD/ED) | Cutoff type                 | SUV <sub>max</sub>                                     |                 | MTV |     | Cutoff<br>value                 | Endpoints |     |
|------------------|-----------------------|-----------------------------|--------------------------------------------------------|-----------------|-----|-----|---------------------------------|-----------|-----|
|                  |                       |                             | definition                                             | Cutoff<br>value | OS  | PFS | definition                      | OS        | PFS |
| Choi (1)         | 118<br>(50/68)        | Continuous or<br>optimal    | LD: tSUV <sub>max</sub><br>ED:<br>wbSUV <sub>max</sub> |                 | +   |     | wbMTV3.0 <sup>1</sup>           | +         |     |
| Kasahara (2)     | 98 (40/58)            | Optimal                     | tSUV <sub>max</sub>                                    | 5.1             | +   |     |                                 |           |     |
| Araz (3)         | 38 (15/23)            | Median                      |                                                        |                 |     |     | wbMTV <sub>software</sub>       | 147       | +   |
| Chang (4)        | 30 (30/0)             | 75 <sup>th</sup> percentile |                                                        |                 |     |     | tMTV2.5                         | 166.6     | +   |
| Fu (5)           | 129<br>(129/0)        | Median                      |                                                        |                 |     |     | wbMTV3.0                        | 266.5     | +   |
| Jin (6)          | 46 (46/0)             | Optimal                     | tSUV <sub>max</sub>                                    | 16              | +   | +   | tMTV2.5                         | 68        | +   |
| Aktan (7)        | 46 (46/0)             | Optimal                     | tSUV <sub>max</sub>                                    | 9.3             | +   | +   |                                 |           |     |
| Dinc (8)         | 90 (33/57)            | Optimal                     | tSUV <sub>max</sub>                                    | 10              |     | +   |                                 |           |     |
| Yilmas (9)       | 142<br>(60/82)        | Continuous                  | tSUV <sub>max</sub>                                    |                 | +   |     |                                 |           |     |
| Kwon (10)        | 59 (59/0)             | Continuous                  | wbSUV <sub>max</sub>                                   |                 | +   | +   | wbMTV2.5                        |           | +   |
| Nobashi1<br>(11) | 28 (14/14)            | Median                      | tSUV <sub>max</sub> <sup>2</sup>                       | 10.6            | +   | +   | wbMTV40                         | 43.9      | +   |
| Nobashi2<br>(11) | 41 (24/17)            | Median                      | tSUV <sub>max</sub> <sup>2</sup>                       | 9.3             | +   | +   | wbMTV40                         | 38.3      | +   |
| Kim SJ (12)      | 82 (31/51)            | Median                      | tSUV <sub>max</sub>                                    | 8.2             | +   | +   |                                 |           |     |
| Ong (13)         | 120<br>(120/0)        | Median                      | tSUV <sub>max</sub>                                    | 12.15           | +   | +   | tMTV42                          | 21.45     | +   |
| Park (14)        | 202<br>(95/107)       | Optimal                     |                                                        |                 |     |     | thoracicMTV <sub>software</sub> | 100       | +   |
| Go (15)          | 145<br>(61/84)        | Median                      | wbSUV <sub>max</sub>                                   | 8.29            | +   |     |                                 |           |     |
| Gomez (16)       | 50 (50/0)             | Median                      | tSUV <sub>max</sub>                                    | 12.7            | +   |     |                                 |           |     |
| Oh 2012<br>(17)  | 106<br>(45/61)        | Median                      | wbSUV <sub>max</sub>                                   | 10.4            | +   | +   | wbMTV3.0                        | 127       | +   |
| Zhu (18)         | 98 (41/57)            | Optimal                     | tSUV <sub>max</sub>                                    | 7.8             | +   | +   | wbMTV2.5                        | 64.4      | +   |
| Chong (19)       | 15 (9/6)              | Optimal                     | wbSUV <sub>max</sub>                                   | 13.7            | +   |     |                                 |           |     |

<sup>1</sup>Results from tMTV3.0 and wbMTV3.0 were available from the LD-cohort. wbMTV3.0 was included in the meta-analysis, as wbMTV was more frequently presented in the remaining studies, in order to reduce interstudy heterogeneity.

<sup>2</sup>Results from tSUV<sub>max</sub> and wbSUV<sub>max</sub> were available. tSUV<sub>max</sub> was included in the meta-analysis, as tSUV<sub>max</sub> was more frequently used in the remaining studies, in order to reduce interstudy heterogeneity.
